# Supplementary material for: Fabrication of Bacterial Cellulose-Curcumin Nanocomposite as a Novel Dressing for Partial Thickness Skin Burn
Source: Front Bioeng Biotechnol. 2020 Sep 15;8:553037. doi: 10.3389/fbioe.2020.553037 (PMC7531241; doi:10.3389/fbioe.2020.553037)
Supplement: Supplementary file 1 [file Data_Sheet_1.docx]

Supplementary Material

**Fabrication of Bacterial Cellulose-Curcumin Nanocomposite as a Novel Dressing for Partial Thickness Skin Burn**

**Wasim Sajjad1,5, Feng He2*, Muhammad Wajid Ullah3, Muhammad Ikram4, Shahid Masood Shah5, Romana Khan6, Taous Khan4, Ayesha Khalid5, Guang Yang3, and Fazli Wahid1***

1Department of Biomedical Sciences, Pak-Austria Fachhochschule: Institute of Applied Sciences and Technology, Mang, Khanpur Road, Haripur, Pakistan

2Hubei Key Laboratory of Economic Forest Germplasm Improvement and Resources Comprehensive Utilization, Huanggang Normal University, Huanggang 43800, PR China

3Department of Biomedical Engineering, Huazhong University of Science and Technology, Wuhan 430074, PR China

4Department of Pharmacy, COMSATS University Islamabad, Abbottabad Campus 22060, Pakistan

5Department of Biotechnology, COMSATS University Islamabad, Abbottabad Campus 22060, Pakistan

6Department of Environmental Sciences, COMSATS University Islamabad, Abbottabad Campus 22060, Pakistan

***Correspondence**

**1. Fazli Wahid** (Email: [fazliwahid@cuiatd.edu.pk](mailto:fazliwahid@cuiatd.edu.pk))

2. Feng He (Email: [hfeng@hust.edu.cn](mailto:hfeng@hust.edu.cn))

Supplementary Material

## Supplementary Figures

##
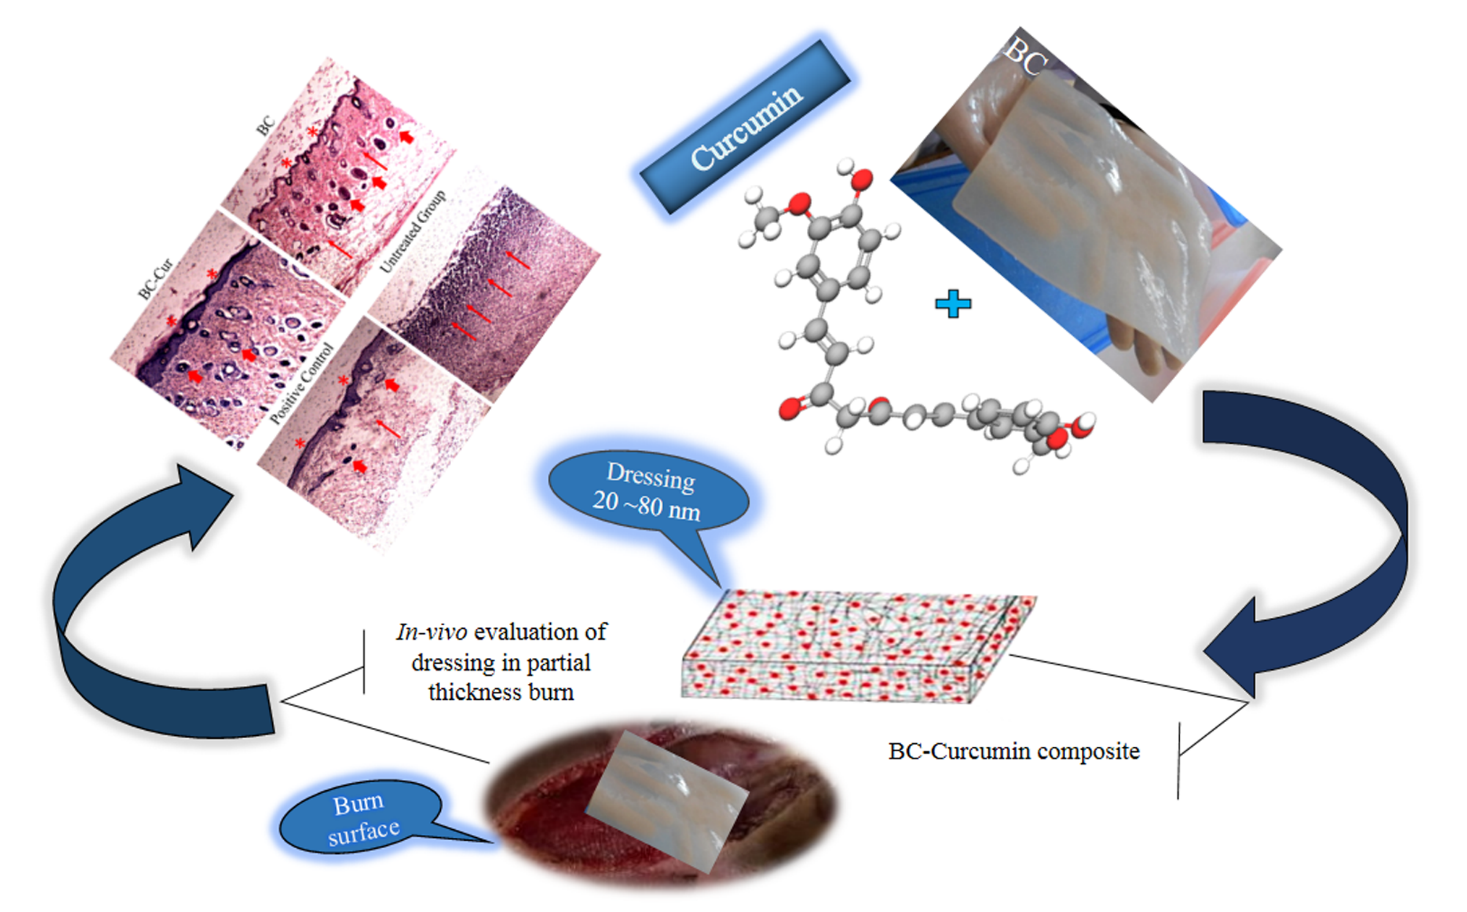


## Supplementary Figure 1. Graphical Abstract (Table of content)

**
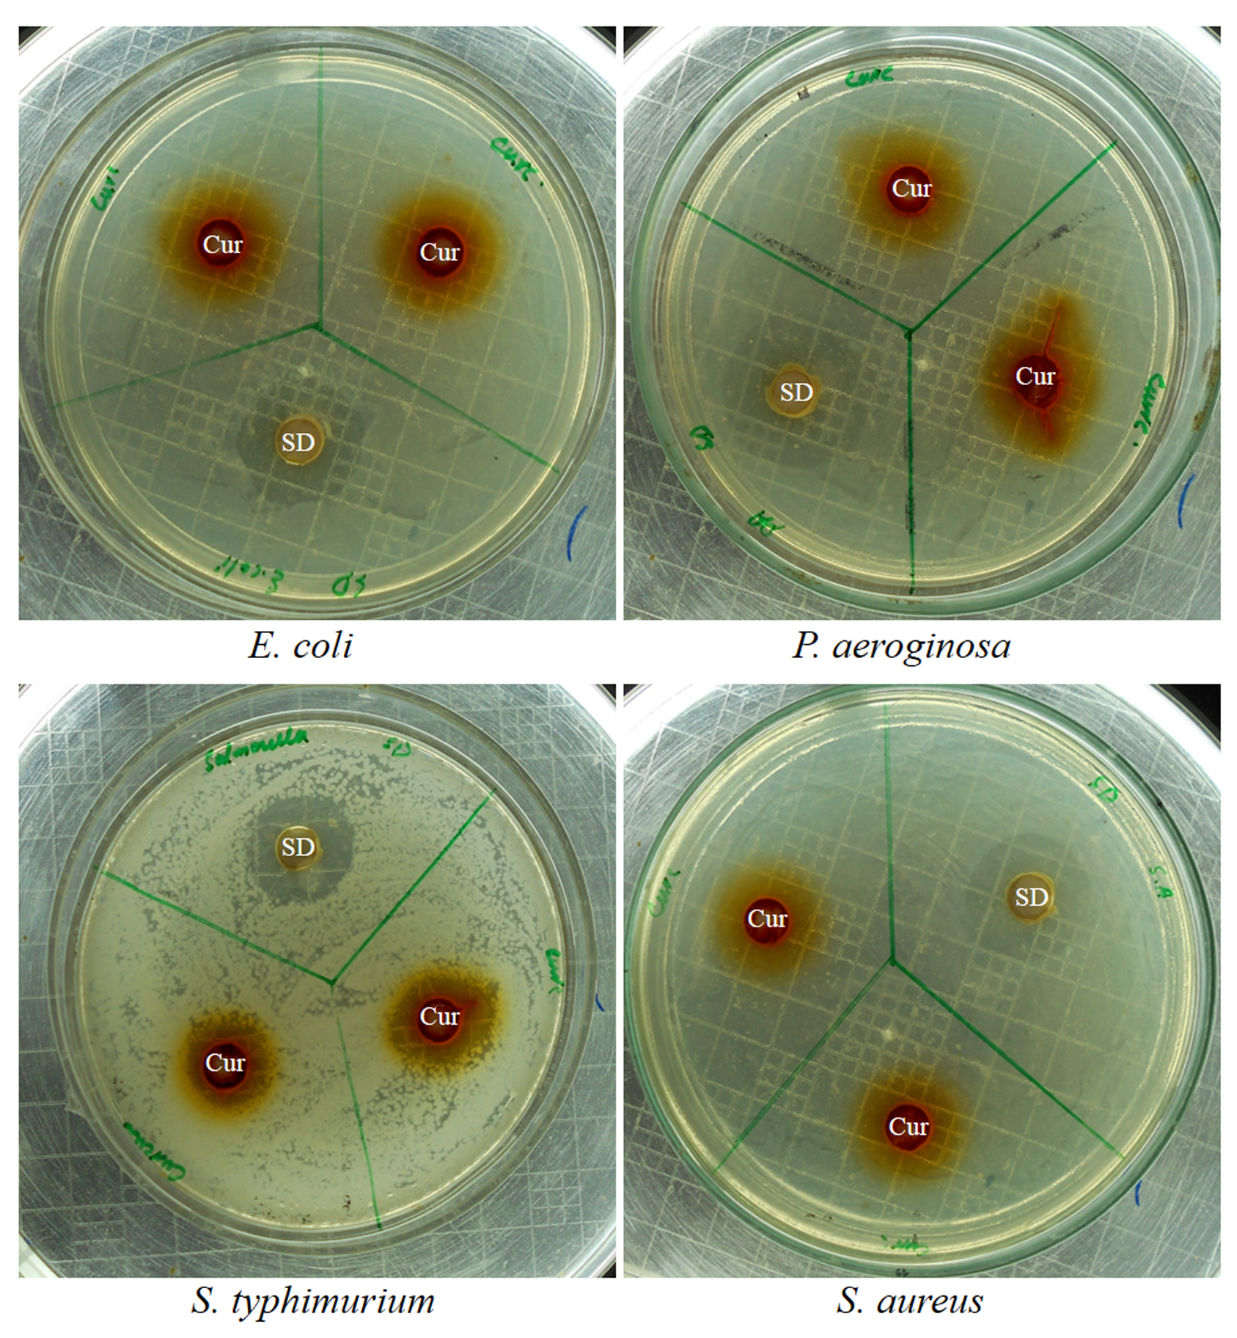
**

**Supplementary Figure 2.** Representative photographs of the antibacterial activity of the curcumin against burn wound pathogens. Curcumin showed prominent effects against *E. coli*, *P. aeruginosa*, *S. typhimurium* and *S. aureus*.

1. **Supplementary Tables**

**Supplementary Table 1.** The zone and percent inhibition of burn associated pathogens by curcumin in comparison to standard drug (silver sulfadiazine).

| **Bacterial species** | **Zone of inhibition (mm)** | | **Percent inhibition** |
| --- | --- | --- | --- |
| **Standard drug** | **Curcumin** |
| ***S. typhimurium*** | 18 ± 0 | 16 ± 0 | 82% |
| ***S. aureus*** | 17.6 ± 0.47 | 15.5 ± 0.4 | 81% |
| ***E. coli*** | 16 ± 0 | 15 ± 0 | 87% |
| ***P. aeruginosa*** | 18.3 ± 0.47 | 16.3 ± 0.4 | 82% |
